# Supplementary material for: NRF2 Mediates Therapeutic Resistance to Chemoradiation in Colorectal Cancer through a Metabolic Switch
Source: MDPI journal article supplement (doi:10.3390/antiox10091380), 2021-08-28
Supplement: s1 [file s1]

Supplementary Table S1. NRF2 E79K+ mutant GSEA REACTOME analysis. All significant results (FDR<0.05) are included. This analysis supports a metabolic upregulation following NRF2 pathway activation.

| NAME                                                                   | SIZE | ES       | NES      | NOM p-val | FDR q-val | FWER p-val |
|------------------------------------------------------------------------|------|----------|----------|-----------|-----------|------------|
| REACTOME_CYTOSOLIC_TRNA_AMINOACYLATION                                 | 24   | 0.799234 | 2.365734 | 0         | 0.00115   | 0.001      |
| REACTOME_AMINO_ACID_TRANSPORT_ACROSS_THE_PLASMA_MEMBRANE               | 19   | 0.751057 | 2.093708 | 0         | 0.034043  | 0.059      |
| REACTOME_3_UTR_MEDIATED_TRANSLATIONAL_REGULATION                       | 101  | 0.541479 | 2.085299 | 0         | 0.026658  | 0.07       |
| REACTOME_PEPTIDE_CHAIN_ELONGATION                                      | 83   | 0.548106 | 2.082995 | 0         | 0.021336  | 0.075      |
| REACTOME_TRNA_AMINOACYLATION                                           | 42   | 0.62209  | 2.054241 | 0.0025    | 0.023814  | 0.1        |
| REACTOME_TRANSLATION                                                   | 140  | 0.504411 | 2.053282 | 0         | 0.020044  | 0.1        |
| REACTOME_ACTIVATION_OF_GENES_BY_ATF4                                   | 21   | 0.712194 | 2.051942 | 0         | 0.017493  | 0.102      |
| REACTOME_SRP_DEPENDENT_COTRANSLATIONAL_PROTEIN_TARGETING_TO_MEMBRANE   | 106  | 0.516262 | 2.023135 | 0         | 0.019919  | 0.13       |
| REACTOME_NONSENSE_MEDIATED_DECAY_ENHANCED_BY_THE_EXON_JUNCTION_COMPLEX | 103  | 0.497637 | 1.951462 | 0         | 0.034997  | 0.249      |
| REACTOME_AMINO_ACID_AND_OLIGOPEPTIDE_SLC_TRANSPORTERS                  | 28   | 0.636472 | 1.951289 | 0.0023    | 0.031497  | 0.249      |
| REACTOME_CLASS_A1_RHODOPSIN_LIKE_RECEPTORS                             | 48   | -0.67473 | -2.14845 | 0         | 0.001957  | 0.002      |

Supplementary Table S2. NRF2 knockdown GSEA REACTOME analysis. All significant results (FDR<0.05) are included. This analysis supports a downregulation amino acid and protein metabolism following NRF2 pathway silencing.

| NAME                                                                                                           | SIZE | ES       | NES      | NOM p-val | FDR q-val | FWER p-val |
|----------------------------------------------------------------------------------------------------------------|------|----------|----------|-----------|-----------|------------|
| REACTOME_PEPTIDE_CHAIN_ELONGATION                                                                              | 83   | -0.5631  | -2.27579 | 0         | 0         | 0          |
| REACTOME_AMINO_ACID_SYNTHESIS_AND_INTERCONVERSION_TRANSAMINATION                                               | 16   | -0.76231 | -2.10528 | 0         | 0.0033    | 0.011      |
| REACTOME_3_UTR_MEDIATED_TRANSLATIONAL_REGULATION                                                               | 101  | -0.49432 | -2.04397 | 0         | 0.0046    | 0.023      |
| REACTOME_SRP_DEPENDENT_COTRANSLATIONAL_PROTEIN_TARGETING_TO_MEMBRANE                                           | 106  | -0.4896  | -2.01264 | 0         | 0.0048    | 0.032      |
| REACTOME_METABOLISM_OF_AMINO_ACIDS_AND_DERIVATIVES                                                             | 147  | -0.44709 | -1.94989 | 0         | 0.0085    | 0.068      |
| REACTOME_INFLUENZA_VIRAL_RNA_TRANSCRIPTION_AND_REPLICATION                                                     | 99   | -0.47132 | -1.92226 | 0         | 0.0106    | 0.097      |
| REACTOME_TIGHT_JUNCTION_INTERACTIONS                                                                           | 17   | -0.67322 | -1.92183 | 0         | 0.0091    | 0.098      |
| REACTOME_FORMATION_OF_THE_TERNARY_COMPLEX_AND_SUBSEQUENTLY_THE_43S_COMPLEX                                     | 47   | -0.52488 | -1.88128 | 0         | 0.0135    | 0.163      |
| REACTOME_TRANSLATION                                                                                           | 140  | -0.43641 | -1.87026 | 0         | 0.0130    | 0.175      |
| REACTOME_NONSENSE_MEDIATED_DECAY_ENHANCED_BY_THE_EXON_JUNCTION_COMPLEX                                         | 103  | -0.44695 | -1.85767 | 0         | 0.0136    | 0.2        |
| REACTOME_CYTOSOLIC_TRNA_AMINOACYLATION                                                                         | 24   | -0.61101 | -1.84534 | 0         | 0.0142    | 0.227      |
| REACTOME_BIOLOGICAL_OXIDATIONS                                                                                 | 57   | -0.49328 | -1.82073 | 0         | 0.0173    | 0.289      |
| REACTOME_PHASE1_FUNCTIONALIZATION_OF_COMPOUNDS                                                                 | 24   | -0.57366 | -1.78451 | 0         | 0.0239    | 0.397      |
| REACTOME_CELL_CELL_JUNCTION_ORGANIZATION                                                                       | 28   | -0.54238 | -1.7345  | 0.0095    | 0.0374    | 0.573      |
| REACTOME_ACTIVATION_OF_THE_MRNA_UPON_BINDING_OF_THE_CAP_BINDING_COMPLEX_AND_EIFS_AND_SUBSEQUENT_BINDING_TO_43S | 54   | -0.46797 | -1.72003 | 0         | 0.0399    | 0.618      |
| REACTOME_CELL_JUNCTION_ORGANIZATION                                                                            | 46   | -0.47985 | -1.70153 | 0         | 0.0447    | 0.679      |
| REACTOME_ACTIVATION_OF_THE_PRE_REPLICATIVE_COMPLEX                                                             | 30   | 0.796686 | 2.612971 | 0         | 0         | 0          |
| REACTOME_G2_M_CHECKPOINTS                                                                                      | 41   | 0.729244 | 2.557482 | 0         | 0         | 0          |
| REACTOME_DNA_REPLICATION                                                                                       | 182  | 0.561845 | 2.540232 | 0         | 0         | 0          |
| REACTOME_DNA_STRAND_ELONGATION                                                                                 | 30   | 0.789028 | 2.5142   | 0         | 0         | 0          |
| REACTOME_ACTIVATION_OF_ATR_IN_RESPONSE_TO_REPLICATION_STRESS                                                   | 35   | 0.739281 | 2.508276 | 0         | 0         | 0          |
| REACTOME_MITOTIC_M_M_G1_PHASES                                                                                 | 163  | 0.552593 | 2.453981 | 0         | 0         | 0          |
| REACTOME_G1_S_TRANSITION                                                                                       | 105  | 0.594157 | 2.4522   | 0         | 0         | 0          |
| REACTOME_CELL_CYCLE_MITOTIC                                                                                    | 297  | 0.509199 | 2.441214 | 0         | 0         | 0          |
| REACTOME_E2F_MEDIATED_REGULATION_OF_DNA_REPLICATION                                                            | 32   | 0.742291 | 2.425769 | 0         | 0         | 0          |
| REACTOME_MITOTIC_G1_G1_S_PHASES                                                                                | 128  | 0.564756 | 2.417765 | 0         | 0         | 0          |
| REACTOME_CELL_CYCLE                                                                                            | 349  | 0.49407  | 2.379414 | 0         | 0         | 0          |
| REACTOME_S_PHASE                                                                                               | 104  | 0.564118 | 2.34609  | 0         | 0         | 0          |
| REACTOME_G1_S_SPECIFIC_TRANSCRIPTION                                                                           | 16   | 0.834893 | 2.328178 | 0         | 0         | 0          |
| REACTOME_M_G1_TRANSITION                                                                                       | 77   | 0.585096 | 2.323481 | 0         | 0         | 0          |
| REACTOME_SYNTHESIS_OF_DNA                                                                                      | 88   | 0.561304 | 2.28107  | 0         | 0         | 0          |

|                                                                                          |     |          |          |        |          |       |
|------------------------------------------------------------------------------------------|-----|----------|----------|--------|----------|-------|
| REACTOME_CHROMOSOME_MAINTENANCE                                                          | 78  | 0.571357 | 2.267552 | 0      | 0        | 0     |
| REACTOME_MITOTIC_PROMETAPHASE                                                            | 82  | 0.560776 | 2.250004 | 0      | 7.93E-05 | 0.001 |
| REACTOME_EXTENSION_OF_TELOMERES                                                          | 27  | 0.703272 | 2.226929 | 0      | 7.49E-05 | 0.001 |
| REACTOME_LAGGING_STRAND_SYNTHESIS                                                        | 19  | 0.737602 | 2.211822 | 0      | 7.10E-05 | 0.001 |
| REACTOME_GO_AND_EARLY_G1                                                                 | 22  | 0.715282 | 2.14326  | 0      | 4.09E-04 | 0.006 |
| REACTOME_TELOMERE_MAINTENANCE                                                            | 42  | 0.608501 | 2.129606 | 0      | 5.30E-04 | 0.008 |
| REACTOME_CELL_CYCLE_CHECKPOINTS                                                          | 110 | 0.488123 | 2.026893 | 0      | 0.0018   | 0.028 |
| REACTOME_GLOBAL_GENOMIC_NER_GG_NER                                                       | 32  | 0.606256 | 2.0155   | 0      | 0.0021   | 0.034 |
| REACTOME_HOMOLOGOUS_RECOMBINATION_REPAIR_OF_REPLICATION_INDEPENDENT_DOUBLE_STRAND_BREAKS | 16  | 0.702464 | 1.955537 | 0      | 0.0046   | 0.075 |
| REACTOME_MEIOTIC_RECOMBINATION                                                           | 30  | 0.588501 | 1.899733 | 0      | 0.0094   | 0.152 |
| REACTOME_DEPOSITION_OF_NEW_CENPA_CONTAINING_NUCLEOSOMES_AT_THE_CENTROMERE                | 29  | 0.598102 | 1.897923 | 0.0020 | 0.0091   | 0.152 |
| REACTOME_PROCESSIVE_SYNTHESIS_ON_THE_LAGGING_STRAND                                      | 15  | 0.706243 | 1.89348  | 0.0020 | 0.0093   | 0.16  |
| REACTOME_DOUBLE_STRAND_BREAK_REPAIR                                                      | 22  | 0.639913 | 1.891811 | 0.002  | 0.0093   | 0.167 |
| REACTOME_ASSEMBLY_OF_THE_PRE_REPLICATIVE_COMPLEX                                         | 62  | 0.48884  | 1.840454 | 0      | 0.0154   | 0.262 |
| REACTOME_MEIOSIS                                                                         | 52  | 0.509952 | 1.835602 | 0.0020 | 0.0157   | 0.275 |
| REACTOME_MITOTIC_G2_G2_M_PHASES                                                          | 73  | 0.474167 | 1.833079 | 0.0020 | 0.0156   | 0.281 |
| REACTOME_TRANSPORT_OF_MATURE_TRANSCRIPT_TO_CYTOPLASM                                     | 52  | 0.499501 | 1.818727 | 0      | 0.0179   | 0.326 |
| REACTOME_FANCONI_ANEMIA_PATHWAY                                                          | 18  | 0.606267 | 1.762154 | 0.0021 | 0.0328   | 0.535 |
| REACTOME_DNA_REPAIR                                                                      | 100 | 0.423156 | 1.755409 | 0      | 0.0337   | 0.558 |
| REACTOME_G_ALPHA_I_SIGNALLING_EVENTS                                                     | 44  | 0.496325 | 1.748535 | 0      | 0.0347   | 0.576 |

Supplementary Table S3. NRF2 E79K+ mutant GSEA Oncogenic signature analysis.

| NAME                      | SIZE       | ES              | NES             | NOM p-val | FDR q-val       | FWER p-val   |
|---------------------------|------------|-----------------|-----------------|-----------|-----------------|--------------|
| ALK_DN.V1_UP              | 52         | 0.670215        | 2.299545        | 0         | 0               | 0            |
| <b>MTOR_UP.N4.V1_UP</b>   | <b>165</b> | <b>0.469496</b> | <b>1.967683</b> | <b>0</b>  | <b>0.006403</b> | <b>0.019</b> |
| KRAS.PROSTATE_UP.V1_DN    | 51         | -0.66015        | -2.14918        | 0         | 0               | 0            |
| MYC_UP.V1_DN              | 108        | -0.56792        | -2.05149        | 0         | 5.19E-04        | 0.001        |
| CAHOY_ASTROGLIAL          | 59         | -0.60038        | -1.98144        | 0         | 0.001844        | 0.005        |
| VEGF_A_UP.V1_UP           | 118        | -0.53079        | -1.93401        | 0         | 0.003465        | 0.012        |
| KRAS.300_UP.V1_DN         | 51         | -0.59428        | -1.89346        | 0         | 0.004441        | 0.019        |
| PTEN_DN.V1_UP             | 68         | -0.54459        | -1.84096        | 0         | 0.008824        | 0.044        |
| KRAS.50_UP.V1_UP          | 17         | -0.71142        | -1.83732        | 0.006838  | 0.007724        | 0.045        |
| KRAS.600_UP.V1_UP         | 109        | -0.50326        | -1.81759        | 0         | 0.0091          | 0.061        |
| E2F3_UP.V1_DN             | 95         | -0.50628        | -1.7997         | 0         | 0.010246        | 0.076        |
| NRL_DN.V1_DN              | 89         | -0.50452        | -1.79742        | 0         | 0.009565        | 0.079        |
| CSR_LATE_UP.V1_DN         | 120        | -0.48118        | -1.78774        | 0         | 0.009232        | 0.084        |
| LEF1_UP.V1_UP             | 127        | -0.48234        | -1.77498        | 0         | 0.009843        | 0.097        |
| KRAS.300_UP.V1_UP         | 55         | -0.541          | -1.74953        | 0         | 0.012793        | 0.133        |
| ESC_V6.5_UP_EARLY.V1_DN   | 116        | -0.47018        | -1.72378        | 0         | 0.016253        | 0.176        |
| MEK_UP.V1_UP              | 164        | -0.44416        | -1.70286        | 0         | 0.01981         | 0.224        |
| KRAS.DF.V1_UP             | 148        | -0.45098        | -1.69347        | 0.001468  | 0.020375        | 0.243        |
| KRAS.600_UP.V1_DN         | 94         | -0.46443        | -1.68108        | 0         | 0.022356        | 0.277        |
| WNT_UP.V1_UP              | 92         | -0.46474        | -1.65521        | 0         | 0.028167        | 0.347        |
| PTEN_DN.V2_DN             | 100        | -0.46704        | -1.65345        | 0.003049  | 0.02705         | 0.351        |
| ESC_J1_UP_EARLY.V1_UP     | 126        | -0.44211        | -1.64985        | 0.002994  | 0.026521        | 0.361        |
| PRC2_EZH2_UP.V1_UP        | 121        | -0.44413        | -1.63661        | 0.001515  | 0.029221        | 0.41         |
| ATF2_S_UP.V1_DN           | 108        | -0.45064        | -1.63398        | 0.001522  | 0.02901         | 0.417        |
| KRAS.LUNG.BREAST_UP.V1_DN | 51         | -0.51224        | -1.62768        | 0.013029  | 0.029498        | 0.437        |
| ATM_DN.V1_DN              | 53         | -0.51461        | -1.62572        | 0.006472  | 0.028806        | 0.445        |
| TGFB_UP.V1_DN             | 138        | -0.4367         | -1.61358        | 0.00146   | 0.032095        | 0.498        |

|                    |     |          |          |          |          |       |
|--------------------|-----|----------|----------|----------|----------|-------|
| YAP1_DN            | 29  | -0.5665  | -1.60421 | 0.014286 | 0.033546 | 0.523 |
| AKT_UP.V1_DN       | 116 | -0.4399  | -1.59714 | 0.003077 | 0.034952 | 0.547 |
| E2F3_UP.V1_UP      | 151 | -0.41642 | -1.58301 | 0.004511 | 0.039827 | 0.617 |
| ALK_DN.V1_DN       | 59  | -0.47934 | -1.57656 | 0.015437 | 0.04124  | 0.643 |
| BMI1_DN.V1_UP      | 91  | -0.44349 | -1.56748 | 0.00753  | 0.043838 | 0.68  |
| ERB2_UP.V1_UP      | 152 | -0.41685 | -1.56326 | 0.004418 | 0.044392 | 0.697 |
| BCAT_BILD_ET_AL_UP | 40  | -0.49852 | -1.56048 | 0.021812 | 0.044442 | 0.711 |
| PTEN_DN.V1_DN      | 76  | -0.45739 | -1.55768 | 0.01129  | 0.044231 | 0.718 |

Supplementary Table S4. NRF2 knockdown mutant GSEA Oncogenic signature analysis.

| NAME                               | SIZE       | ES              | NES             | NOM p-val | FDR q-val       | FWER p-val   |
|------------------------------------|------------|-----------------|-----------------|-----------|-----------------|--------------|
| IL21_UP.V1_UP                      | 92         | -0.47337        | -1.90405        | 0         | 0.012854        | 0.011        |
| <b>MTOR_UP.N4.V1_UP</b>            | <b>171</b> | <b>-0.39813</b> | <b>-1.77579</b> | <b>0</b>  | <b>0.036614</b> | <b>0.059</b> |
| ALK_DN.V1_UP                       | 56         | -0.47246        | -1.75122        | 0.004049  | 0.030048        | 0.072        |
| PTEN_DN.V1_UP                      | 69         | -0.45327        | -1.73777        | 0.001862  | 0.026064        | 0.084        |
| AKT_UP.V1_DN                       | 117        | -0.41141        | -1.71746        | 0         | 0.02664         | 0.108        |
| SIRNA_EIF4GI_UP                    | 81         | -0.43633        | -1.71697        | 0         | 0.0222          | 0.108        |
| LEF1_UP.V1_DN                      | 130        | -0.4017         | -1.7097         | 0         | 0.020873        | 0.117        |
| RB_P107_DN.V1_DN                   | 110        | -0.39854        | -1.6641         | 0.001818  | 0.030548        | 0.194        |
| STK33_SKM_DN                       | 163        | -0.37701        | -1.66388        | 0         | 0.027154        | 0.194        |
| NFE2L2.V2                          | 248        | -0.35701        | -1.6618         | 0         | 0.025256        | 0.199        |
| SINGH_KRAS_DEPENDENCY_SIGNATURE_   | 16         | -0.59216        | -1.65568        | 0.023576  | 0.025196        | 0.213        |
| CRX_DN.V1_UP                       | 81         | -0.40831        | -1.64652        | 0.003906  | 0.02516         | 0.233        |
| STK33_DN                           | 180        | -0.35853        | -1.62032        | 0.001908  | 0.031088        | 0.294        |
| KRAS.600.LUNG.BREAST_UP.V1_DN      | 116        | -0.38068        | -1.58068        | 0.005882  | 0.04256         | 0.398        |
| P53_DN.V1_UP                       | 151        | -0.35903        | -1.57641        | 0.001946  | 0.041446        | 0.411        |
| ESC_V6.5_UP_LATE.V1_DN             | 133        | -0.36218        | -1.56657        | 0.002033  | 0.043682        | 0.448        |
| MEL18_DN.V1_DN                     | 80         | -0.40281        | -1.56446        | 0.007921  | 0.042061        | 0.455        |
| STK33_NOMO_DN                      | 175        | -0.34682        | -1.54792        | 0         | 0.047221        | 0.525        |
| RB_DN.V1_DN                        | 98         | -0.37802        | -1.5444         | 0.009579  | 0.046309        | 0.538        |
| KRAS.50_UP.V1_UP                   | 19         | -0.54168        | -1.53935        | 0.039698  | 0.04613         | 0.554        |
| EIF4E_UP                           | 72         | -0.39256        | -1.51047        | 0.008032  | 0.058685        | 0.651        |
| RB_P107_DN.V1_UP                   | 108        | 0.553455        | 2.293732        | 0         | 0               | 0            |
| CSR_LATE_UP.V1_UP                  | 142        | 0.519952        | 2.268417        | 0         | 0               | 0            |
| GCPN_SHH_UP_LATE.V1_UP             | 154        | 0.465391        | 2.054174        | 0         | 0               | 0            |
| E2F3_UP.V1_UP                      | 135        | 0.476593        | 2.047229        | 0         | 0               | 0            |
| PRC2_EED_UP.V1_DN                  | 166        | 0.434526        | 1.927086        | 0         | 0.001655        | 0.01         |
| E2F1_UP.V1_UP                      | 163        | 0.429576        | 1.90736         | 0         | 0.001526        | 0.011        |
| VEGF_A_UP.V1_DN                    | 160        | 0.41161         | 1.841662        | 0         | 0.002444        | 0.021        |
| RPS14_DN.V1_DN                     | 160        | 0.413383        | 1.809671        | 0         | 0.003578        | 0.035        |
| SRC_UP.V1_DN                       | 114        | 0.411419        | 1.737402        | 0         | 0.007485        | 0.078        |
| CORDENONSI_YAP_CONSERVED_SIGNATURE | 45         | 0.475667        | 1.704668        | 0         | 0.010228        | 0.117        |
| ERB2_UP.V1_DN                      | 161        | 0.367355        | 1.655628        | 0         | 0.016828        | 0.201        |
| GCPN_SHH_UP_EARLY.V1_UP            | 140        | 0.370996        | 1.614719        | 0.002028  | 0.024544        | 0.301        |
| PRC2_EZH2_UP.V1_DN                 | 127        | 0.363001        | 1.571153        | 0.002165  | 0.035774        | 0.444        |
| CAHOY_NEURONAL                     | 33         | 0.474663        | 1.5679          | 0.023061  | 0.034399        | 0.455        |
| HOXA9_DN.V1_DN                     | 152        | 0.356651        | 1.567665        | 0         | 0.032106        | 0.455        |
| STK33_NOMO_UP                      | 199        | 0.339778        | 1.540373        | 0.002151  | 0.039461        | 0.549        |
| PTEN_DN.V2_DN                      | 97         | 0.373564        | 1.525151        | 0.008282  | 0.043874        | 0.606        |
| CAMP_UP.V1_DN                      | 156        | 0.340292        | 1.515154        | 0         | 0.045645        | 0.647        |

Table S5. List of gene names for the 216 overlapping genes from the RNAseq analysis

|           |
|-----------|
| Gene name |
| AARS      |
| ABCC2     |
| ABLIM1    |
| ACSL3     |
| ACTN4     |
| ADGRB2    |
| ADGRG1    |
| ADM       |
| AK2       |
| ALDOC     |
| ANGPTL4   |
| ANXA1     |
| ANXA2     |
| AREG      |
| ARHGAP23  |
| ARHGAP29  |
| ARL4C     |
| ARRB1     |
| ASAH1     |
| ASNS      |
| ASS1      |
| ATF4      |
| ATL3      |
| BCL3      |
| BHLHE40   |
| BMP4      |
| BTN3A2    |
| BUD31     |
| CALCOCO2  |
| CAMK2D    |
| CAPG      |
| CARS      |
| CDH1      |
| CDK1      |
| CEBPG     |
| CHAC1     |
| CIC       |
| CLDN7     |
| COQ5      |
| CRABP2    |
| CTSB      |
| CYBRD1    |
| CYR61     |
| DDIT4     |
| DEPDC1    |
| DHCR24    |
| DHRS2     |
| DIXDC1    |

|          |
|----------|
| DNMT3B   |
| DPYSL3   |
| EHBP1    |
| EHF      |
| EIF2S2   |
| EIF4EBP1 |
| ELF3     |
| EMP3     |
| EPB41L1  |
| EPRS     |
| ERMP1    |
| ESRP1    |
| ETV4     |
| FAM111B  |
| FAM83D   |
| FAM84B   |
| FDXR     |
| FGFBP1   |
| FHL2     |
| FLOT1    |
| FTL      |
| FUS      |
| GARS     |
| GATA2    |
| GDA      |
| GDF15    |
| GLO1     |
| GNAI1    |
| GPT2     |
| GRB10    |
| GSN      |
| GTF3C4   |
| H1F0     |
| HAS3     |
| HAX1     |
| HEATR5A  |
| HKDC1    |
| HLA-E    |
| HNF4A    |
| HOXB5    |
| HOXB6    |
| HOXB8    |
| HSPA8    |
| HYOU1    |
| ID1      |
| IER3     |
| IFI6     |
| IGFBP3   |
| INADL    |
| INSIG1   |
| ITGA3    |

|          |
|----------|
| ITGB4    |
| JADE2    |
| KIF18A   |
| KLF5     |
| KLK6     |
| L3MBTL3  |
| LAD1     |
| LAMA3    |
| LAMC2    |
| LGALS1   |
| LPCAT1   |
| LPCAT3   |
| LRP11    |
| LRRC45   |
| LSS      |
| MAGI1    |
| MAP1B    |
| MAP7     |
| MARS     |
| MBNL1    |
| MCC      |
| MET      |
| MTHFD2   |
| MYL9     |
| NARS     |
| NDRG1    |
| NIPSNAP1 |
| NRAS     |
| NT5E     |
| NTSR1    |
| NUP155   |
| NUP160   |
| OBFC1    |
| PALLD    |
| PCK2     |
| PCTP     |
| PGPEP1   |
| PHGDH    |
| PHTF2    |
| PIK3R3   |
| PLCB3    |
| PRKCDBP  |
| PRRC2B   |
| PRSS33   |
| PSAT1    |
| PSME1    |
| PSPH     |
| PTPN1    |
| PTPN14   |
| PTRF     |
| PYCR1    |

|          |
|----------|
| PYGB     |
| RAD18    |
| RASSF8   |
| RBCK1    |
| RNF145   |
| RSL24D1  |
| RUNX1    |
| SAMD9    |
| SARS     |
| SAT1     |
| SCG2     |
| SDCBP    |
| SEL1L3   |
| SEMA3C   |
| SEMA4B   |
| SERPINB6 |
| SERPINE1 |
| SERPINH1 |
| SESN2    |
| SESN3    |
| SGOL2    |
| SH3BP4   |
| SH3KBP1  |
| SHMT2    |
| SKI      |
| SLC16A5  |
| SLC1A4   |
| SLC1A5   |
| SLC2A6   |
| SLC3A2   |
| SLC43A1  |
| SLC4A5   |
| SLC7A5   |
| SMARCA1  |
| SNN      |
| SNTB1    |
| SOX9     |
| SREBF1   |
| SRSF6    |
| ST14     |
| STC2     |
| SYDE1    |
| TAPBP    |
| TBCD     |
| TBX3     |
| TES      |
| TGFBR3   |
| TMEM2    |
| TRIB3    |
| TRIP13   |
| TSEN15   |

|         |
|---------|
| TSPAN5  |
| TUBE1   |
| TXNRD1  |
| UBE2H   |
| UBTF    |
| ULBP1   |
| UNC5B   |
| UPP1    |
| WARS    |
| XPOT    |
| YARS    |
| YOD1    |
| ZCCHC24 |
| ZNF367  |
| ZNF503  |

*Table S6. List of 141 gene names that were shared but were differentially expressed inopposing directions.*

| Gene name |
|-----------|
| AARS      |
| ABLIM1    |
| ACSL3     |
| ACTN4     |
| ADGRB2    |
| ADGRG1    |
| ADM       |
| AK2       |
| ANXA1     |
| ANXA2     |
| AREG      |
| ARHGAP23  |
| ARL4C     |
| ARRB1     |
| ASNS      |
| ASS1      |
| ATF4      |
| ATL3      |
| BMP4      |
| BUD31     |
| CALCOCO2  |
| CAMK2D    |
| CARS      |
| CDH1      |
| CEBPG     |
| CHAC1     |
| CIC       |
| CLDN7     |
| COQ5      |
| CTSB      |
| CYBRD1    |
| DDIT4     |

|          |
|----------|
| DHCR24   |
| DIXDC1   |
| DPYSL3   |
| EHBP1    |
| EIF2S2   |
| EIF4EBP1 |
| EPRS     |
| ESRP1    |
| ETV4     |
| FAM111B  |
| FAM84B   |
| FGFBP1   |
| FHL2     |
| FTL      |
| GARS     |
| GATA2    |
| GDA      |
| GDF15    |
| GNAI1    |
| GPT2     |
| GRB10    |
| GTF3C4   |
| H1F0     |
| HAX1     |
| HEATR5A  |
| HKDC1    |
| HOXB5    |
| HOXB6    |
| HOXB8    |
| HYOU1    |
| IER3     |
| IFI6     |
| INADL    |
| INSIG1   |
| JADE2    |
| KIF18A   |
| KLK6     |
| LAD1     |
| LAMA3    |
| LAMC2    |
| LGALS1   |
| LPCAT1   |
| LPCAT3   |
| LRRC45   |
| LSS      |
| MAP1B    |
| MAP7     |
| MARS     |
| MBNL1    |
| MET      |
| MTHFD2   |

|          |
|----------|
| MYL9     |
| NARS     |
| NIPSNAP1 |
| NT5E     |
| NTSR1    |
| PCK2     |
| PCTP     |
| PGPEP1   |
| PHGDH    |
| PIK3R3   |
| PLCB3    |
| PSAT1    |
| PSPH     |
| PTRF     |
| PYCR1    |
| PYGB     |
| RSL24D1  |
| SARS     |
| SAT1     |
| SCG2     |
| SEL1L3   |
| SEMA3C   |
| SERPINE1 |
| SESN2    |
| SESN3    |
| SH3KBP1  |
| SHMT2    |
| SKI      |
| SLC1A4   |
| SLC1A5   |
| SLC2A6   |
| SLC3A2   |
| SLC43A1  |
| SLC4A5   |
| SLC7A5   |
| SMARCA1  |
| SNN      |
| SOX9     |
| SREBF1   |
| ST14     |
| STC2     |
| SYDE1    |
| TBCD     |
| TBX3     |
| TES      |
| TRIB3    |
| TSEN15   |
| TUBE1    |
| TXNRD1   |
| UBTF     |
| ULBP1    |

|         |
|---------|
| UPP1    |
| WARS    |
| XPOT    |
| YARS    |
| ZCCHC24 |
| ZNF367  |
| ZNF503  |

Table S7. List of the 36 genes that constitute the NRF2 expression signature.

| Gene name |
|-----------|
| ABCA8     |
| ABI3BP    |
| ADAM12    |
| ADRB1     |
| ANGPT1    |
| ANKRD29   |
| ANKRD44   |
| BCHE      |
| C15orf48  |
| COL3A1    |
| COL5A1    |
| EGLN3     |
| LIFR      |
| METTL7A   |
| PCM1      |
| PLAU      |
| PLCB4     |
| RECK      |
| RGCC      |
| RRM2      |
| SEC14L4   |
| SERPINH1  |
| SFN       |
| SLIT3     |
| SPP1      |
| TNSI      |
| TOM1L2    |
| TSPAN5    |
| TTYH3     |
| VSIG10    |
| VCAN      |
| AKR1C1    |
| LRP8      |
| NAMPT     |
| PTGES     |
| SLC27A5   |
