# Supplementary material for: NRF2 Mediates Therapeutic Resistance to Chemoradiation in Colorectal Cancer through a Metabolic Switch
Source: Antioxidants (Basel). 2021 Aug 28;10(9):1380. doi: 10.3390/antiox10091380 (PMC8466195; doi:10.3390/antiox10091380)
Supplement: Supplementary file 1 [file antioxidants-10-01380-s001.zip]

Archive with 5 entries (5 files):
- Supp Figure S1.pptx
- Supplementary Figure S2.pptx
- Supplementary Figure S3.pptx
- Supplementary methods_Antioxidants_revised.pdf
- Supplementary Tables.pdf
